# Supplementary material for: Improved Oxidative Stability and Sensory Quality of Beef Hamburgers Enriched with a Phenolic Extract from Olive Vegetation Water
Source: MDPI journal article supplement (doi:10.3390/antiox10121969), 2021-12-09
Supplement: s1 [file s1]

**Table S1.** Total Fatty acid composition (expressed as % of total fatty acid) of raw and grilled beef burger after 0,6 and 9 days of storage. C, Control samples (minced beef+ maltodextrin+ starter cultures); L1, minced beef+ starter cultures+87.5 mg of phenols / Kg of meat; L2, minced beef+ starter cultures+175 mg of phenols / Kg of meat.

|                 |        | C12:0                  | C14:0                   | C14:1          | C15:0          | C15:1                   | C16:0                   | C16:1 <i>t n</i> 7     | C16:1 <i>n</i> 7       |
|-----------------|--------|------------------------|-------------------------|----------------|----------------|-------------------------|-------------------------|------------------------|------------------------|
|                 |        | (% Total Fatty Acid)   |                         |                |                |                         |                         |                        |                        |
| Raw samples     | 0 days |                        |                         |                |                |                         |                         |                        |                        |
|                 | C      | 0.06±0.00 <sup>Y</sup> | 2.66±0.19               | 1.03±0.17      | 0.35±0.05      | 0.17±0.03               | 24.60±0.74              | 6.39±0.86 <sup>X</sup> | 0.42±0.04 <sup>X</sup> |
|                 | L1     | 0.08±0.02              | 2.86±0.30               | 0.87±0.11      | 0.40±0.07      | 0.17±0.00               | 24.15±0.72              | 5.62±0.59 <sup>X</sup> | 0.24±0.15 <sup>X</sup> |
|                 | L2     | 0.06±0.01              | 2.57±0.13               | 0.98±0.22      | 0.35±0.03      | 0.18±0.01               | 23.86±1.99              | 5.88±1.26 <sup>X</sup> | 0.37±0.05 <sup>X</sup> |
|                 | 6 days |                        |                         |                |                |                         |                         |                        |                        |
|                 | C      | 0.08±0.02              | 2.60±0.30               | 0.93±0.09      | 0.37±0.07      | 0.17±0.01               | 22.70±2.55              | 6.12±0.68 <sup>X</sup> | 0.11±0.03 <sup>X</sup> |
|                 | L1     | 0.08±0.02              | 2.89±0.43               | 1.14±0.18      | 0.40±0.10      | 0.19±0.01               | 25.85±0.50              | 6.96±0.85 <sup>X</sup> | 0.26±0.19 <sup>X</sup> |
|                 | L2     | 0.07±0.02              | 2.90±0.35               | 1.08±0.26      | 0.39±0.09      | 0.20±0.00 <sup>A</sup>  | 24.93±0.47              | 5.76±0.61 <sup>X</sup> | 0.39±0.03 <sup>X</sup> |
|                 | 9 days |                        |                         |                |                |                         |                         |                        |                        |
|                 | C      | 0.07±0.01              | 2.74±0.17               | 0.90±0.24      | 0.41±0.05      | 0.18±0.02 <sup>B</sup>  | 23.88±1.06              | 5.89±0.96 <sup>X</sup> | 0.11±0.04 <sup>Y</sup> |
|                 | L1     | 0.07±0.01              | 3.01±0.14               | 1.12±0.24      | 0.41±0.04      | 0.19±0.02 <sup>AB</sup> | 26.21±1.12 <sup>a</sup> | 6.63±1.05 <sup>X</sup> | 0.38±0.02 <sup>Y</sup> |
|                 | L2     | 0.07±0.01              | 2.68±0.15               | 1.14±0.29      | 0.36±0.06      | 0.19±0.02               | 24.22±1.75              | 6.95±1.34 <sup>X</sup> | 0.36±0.05 <sup>Y</sup> |
| Grilled samples | 0 days |                        |                         |                |                |                         |                         |                        |                        |
|                 | C      | 0.09±0.00 <sup>X</sup> | 2.84±0.15 <sup>AB</sup> | 1.18±0.27      | 0.38±0.04      | 0.18±0.01               | 25.14±1.83              | 4.79±0.77 <sup>X</sup> | 0.10±0.02 <sup>Y</sup> |
|                 | L1     | 0.09±0.02              | 3.20±0.29 <sup>A</sup>  | 1.05±0.18      | 0.43±0.06      | 0.19±0.01               | 26.18±2.23              | 4.42±0.53 <sup>X</sup> | 0.07±0.03 <sup>Y</sup> |
|                 | L2     | 0.07±0.01              | 2.58±0.13 <sup>B</sup>  | 1.89±0.99      | 0.34±0.00      | 0.18±0.01               | 24.89±1.35              | 4.83±0.85 <sup>X</sup> | 0.09±0.01 <sup>Y</sup> |
|                 | 6 days |                        |                         |                |                |                         |                         |                        |                        |
|                 | C      | 0.08±0.01              | 2.92±0.08               | 1.03±0.18      | 0.40±0.02      | 0.18±0.01               | 24.26±2.22              | 4.38±0.51 <sup>X</sup> | 0.08±0.02 <sup>Y</sup> |
|                 | L1     | 0.07±0.01              | 2.13±1.30               | 0.89±0.39      | 0.39±0.05      | 0.19±0.01               | 25.01±0.58              | 4.57±0.54 <sup>X</sup> | 0.08±0.01 <sup>Y</sup> |
|                 | L2     | 0.07±0.01              | 2.67±0.18               | 1.07±0.20      | 0.39±0.04      | 0.18±0.02               | 24.80±1.26              | 4.59±0.63 <sup>X</sup> | 0.08±0.01 <sup>Y</sup> |
|                 | 9 days |                        |                         |                |                |                         |                         |                        |                        |
|                 | C      | 0.08±0.01              | 2.72±0.39 <sup>a</sup>  | 1.04±0.28      | 0.39±0.07      | 0.18±0.00               | 23.16±0.88              | 4.10±0.28 <sup>X</sup> | 0.08±0.01 <sup>Y</sup> |
|                 | L1     | 0.08±0.02              | 2.82±0.49 <sup>ab</sup> | 1.11±0.13      | 0.39±0.08      | 0.19±0.01               | 25.15±0.67              | 4.66±0.47 <sup>X</sup> | 0.09±0.01 <sup>Y</sup> |
|                 | L2     | 0.08±0.01              | 2.96±0.04 <sup>a</sup>  | 1.00±0.25      | 0.41±0.04      | 0.20±0.02               | 25.04±1.73              | 4.27±0.65 <sup>X</sup> | 0.09±0.03 <sup>Y</sup> |
| Factor          |        | F value                |                         |                |                |                         |                         |                        |                        |
| Form            |        | 0.71 <i>ns</i>         | 0.07 <i>ns</i>          | 1.85 <i>ns</i> | 0.51 <i>ns</i> | 2.79 <i>ns</i>          | 5.04 <i>ns</i>          | 3.16 <i>ns</i>         | 0.05 <i>ns</i>         |
| St              |        | 0.05 <i>ns</i>         | 0.50 <i>ns</i>          | 1.83 <i>ns</i> | 0.77 <i>ns</i> | 1.02 <i>ns</i>          | 0.00 <i>ns</i>          | 0.99 <i>ns</i>         | 0.83 <i>ns</i>         |
| Gr              |        | 2.51 <i>ns</i>         | 0.10 <i>ns</i>          | 2.47 <i>ns</i> | 0.22 <i>ns</i> | 0.00 <i>ns</i>          | 0.12 <i>ns</i>          | 0.76 <sup>***</sup>    | 312.06 <sup>***</sup>  |
| Form*St         |        | 0.20 <i>ns</i>         | 1.00 <i>ns</i>          | 1.06 <i>ns</i> | 0.22 <i>ns</i> | 0.68 <i>ns</i>          | 0.93 <i>ns</i>          | 0.69 <i>ns</i>         | 0.78 <i>ns</i>         |



|                   |                |                |                |                |                |                 |                |                |
|-------------------|----------------|----------------|----------------|----------------|----------------|-----------------|----------------|----------------|
| <b>Form</b>       | 0.12 <i>ns</i> | 0.82 <i>ns</i> | 0.24 <i>ns</i> | 2.54 <i>ns</i> | 2.28 <i>ns</i> | 10.16 <i>ns</i> | 1.12 <i>ns</i> | 0.60 <i>ns</i> |
| <b>St</b>         | 0.17 <i>ns</i> | 1.71 <i>ns</i> | 0.05 <i>ns</i> | 0.65 <i>ns</i> | 0.22 <i>ns</i> | 1.28 <i>ns</i>  | 0.88 <i>ns</i> | 0.20 <i>ns</i> |
| <b>Gr</b>         | 0.12 <i>ns</i> | 8.53***        | 0.09 <i>ns</i> | 1.96 <i>ns</i> | 0.05 <i>ns</i> | 4.94 <i>ns</i>  | 0.86 <i>ns</i> | 1.63 <i>ns</i> |
| <b>Form*St</b>    | 0.03 <i>ns</i> | 0.07 <i>ns</i> | 0.11 <i>ns</i> | 0.61 <i>ns</i> | 0.36 <i>ns</i> | 0.64 <i>ns</i>  | 0.93 <i>ns</i> | 0.78 <i>ns</i> |
| <b>Form*Gr</b>    | 0.01 <i>ns</i> | 0.57 <i>ns</i> | 0.22 <i>ns</i> | 0.01 <i>ns</i> | 3.08 <i>ns</i> | 0.21 <i>ns</i>  | 0.89 <i>ns</i> | 0.85 <i>ns</i> |
| <b>St*Gr</b>      | 0.11 <i>ns</i> | 0.15 <i>ns</i> | 0.04 <i>ns</i> | 0.70 <i>ns</i> | 0.81 <i>ns</i> | 1.89 <i>ns</i>  | 1.11 <i>ns</i> | 1.70 <i>ns</i> |
| <b>Form*St*Gr</b> | 0.39 <i>ns</i> | 0.26 <i>ns</i> | 0.48 <i>ns</i> | 0.76 <i>ns</i> | 0.72 <i>ns</i> | 3.32 <i>ns</i>  | 1.12 <i>ns</i> | 1.66 <i>ns</i> |

Results as reported like means± standard deviation. a–b indicates significant differences ( $p < 0.05$ ) between the same sample during the shelf-life, A-C indicate significant differences ( $p < 0.05$ ) between treatments, X-Y indicate significant differences (Tukey's test;  $p \leq 0.05$ ) between raw and grilled samples. \* $p < 0.05$ , \*\* $p < 0.01$ , \*\*\* $p < 0.001$ . **Form**, formulation; **Gr**, grilling; **St**, storage.

|                 |        | C20:1                | C20:2                    | C22:0                   | C20:5                  | C22:5                   | C22:6                   |
|-----------------|--------|----------------------|--------------------------|-------------------------|------------------------|-------------------------|-------------------------|
|                 |        | (% Total Fatty Acid) |                          |                         |                        |                         |                         |
|                 |        | 0 days               |                          |                         |                        |                         |                         |
| Raw samples     | C      | 0.24±0.00            | 0.29±0.03                | 0.14±0.01               | 0.29±0.09              | 0.35±0.05               | 0.07±0.01               |
|                 | L1     | 0.22±0.02            | 0.32±0.05 <sup>a</sup>   | 0.17±0.05 <sup>a</sup>  | 0.38±0.20 <sup>a</sup> | 0.28±0.05               | 0.07±0.02 <sup>a</sup>  |
|                 | L2     | 0.24±0.02            | 0.32±0.10                | 0.18±0.08               | 0.49±0.32              | 0.36±0.05               | 0.11±0.06               |
|                 | 6 days |                      |                          |                         |                        |                         |                         |
|                 | C      | 0.24±0.01            | 0.34±0.05 <sup>A</sup>   | 0.15±0.03               | 0.29±0.04              | 0.39±0.13               | 0.09±0.01               |
|                 | L1     | 0.21±0.14            | 0.27±0.02 <sup>b,B</sup> | 0.12±0.03 <sup>b</sup>  | 0.24±0.07 <sup>b</sup> | 0.42±0.08               | 0.18±0.06 <sup>a</sup>  |
|                 | L2     | 0.24±0.02            | 0.20±0.10 <sup>AB</sup>  | 0.15±0.04 <sup>Y</sup>  | 0.27±0.06              | 0.32±0.03 <sup>X</sup>  | 0.10±0.11               |
|                 | 9 days |                      |                          |                         |                        |                         |                         |
|                 | C      | 0.24±0.02            | 0.42±0.11                | 0.15±0.01               | 0.28±0.10              | 0.35±0.05 <sup>X</sup>  | 0.07±0.02               |
|                 | L1     | 0.19±0.12            | 0.28±0.02 <sup>b,Y</sup> | 0.12±0.04 <sup>Y</sup>  | 0.22±0.04 <sup>Y</sup> | 0.37±0.04 <sup>X</sup>  | 0.18±0.04 <sup>ab</sup> |
|                 | L2     | 0.23±0.01            | 0.29±0.09                | 0.11±0.10               | 0.23±0.30              | 0.30±0.03 <sup>X</sup>  | 0.05±0.05               |
|                 |        | 0 days               |                          |                         |                        |                         |                         |
| Grilled samples | C      | 0.22±0.03            | 0.29±0.04                | 0.19±0.07 <sup>AB</sup> | 0.48±0.26              | 0.27±0.03 <sup>AB</sup> | 0.11±0.04               |
|                 | L1     | 0.23±0.04            | 0.26±0.02                | 0.25±0.02 <sup>A</sup>  | 0.37±0.29              | 0.07±0.13 <sup>B</sup>  | 0.04±0.06               |
|                 | L2     | 0.24±0.01            | 0.28±0.05                | 0.11±0.03 <sup>B</sup>  | 0.29±0.06              | 0.30±0.03 <sup>A</sup>  | 0.05±0.02               |
|                 | 6 days |                      |                          |                         |                        |                         |                         |
|                 | C      | 0.22±0.01            | 0.34±0.04                | 0.16±0.04               | 0.32±0.15              | 0.22±0.02               | 0.08±0.03               |
|                 | L1     | 0.25±0.02            | 0.29±0.16                | 0.11±0.12               | 0.30±0.38              | 0.16±0.14               | 0.06±0.07               |
|                 | L2     | 0.25±0.00            | 0.31±0.02                | 0.12±0.02 <sup>X</sup>  | 0.28±0.03              | 0.16±0.14 <sup>Y</sup>  | 0.06±0.03               |
|                 | 9 days |                      |                          |                         |                        |                         |                         |
|                 |        |                      |                          |                         |                        |                         |                         |

|                   |                |                        |                        |                        |                        |                |
|-------------------|----------------|------------------------|------------------------|------------------------|------------------------|----------------|
| <b>C</b>          | 0.22±0.02      | 0.37±0.03              | 0.19±0.03              | 0.42±0.16              | 0.26±0.03 <sup>Y</sup> | 0.10±0.01      |
| <b>L1</b>         | 0.22±0.02      | 0.29±0.06 <sup>X</sup> | 0.15±0.07 <sup>X</sup> | 0.34±0.27 <sup>X</sup> | 0.23±0.06 <sup>Y</sup> | 0.09±0.05      |
| <b>L2</b>         | 0.23±0.02      | 0.28±0.04              | 0.18±0.02              | 0.30±0.02              | 0.22±0.01 <sup>Y</sup> | 0.05±0.01      |
| <b>Factor</b>     | <b>F value</b> |                        |                        |                        |                        |                |
| <b>Form</b>       | 0.83 <i>ns</i> | 24.05 <i>ns</i>        | 7.43 <i>ns</i>         | 3.83 <i>ns</i>         | 0.72 <i>ns</i>         | 3.00 <i>ns</i> |
| <b>St</b>         | 0.51 <i>ns</i> | 2.10 <i>ns</i>         | 7.59 <i>ns</i>         | 3.69 <i>ns</i>         | 0.05 <i>ns</i>         | 0.43 <i>ns</i> |
| <b>Gr</b>         | 0.33 <i>ns</i> | 0.93 <i>ns</i>         | 9.94 <sup>**</sup>     | 2.70 <i>ns</i>         | 29.38 <i>ns</i>        | 4.53 <i>ns</i> |
| <b>Form*St</b>    | 0.15 <i>ns</i> | 2.01 <i>ns</i>         | 2.21 <i>ns</i>         | 0.25 <i>ns</i>         | 1.36 <i>ns</i>         | 2.22 <i>ns</i> |
| <b>Form*Gr</b>    | 1.06 <i>ns</i> | 0.56 <i>ns</i>         | 1.91 <i>ns</i>         | 1.55 <i>ns</i>         | 1.59 <i>ns</i>         | 8.01 <i>ns</i> |
| <b>St*Gr</b>      | 0.08 <i>ns</i> | 4.76 <i>ns</i>         | 0.23 <i>ns</i>         | 0.56 <i>ns</i>         | 1.93 <i>ns</i>         | 1.35 <i>ns</i> |
| <b>Form*St*Gr</b> | 0.21 <i>ns</i> | 6.33 <sup>**</sup>     | 2.20 <i>ns</i>         | 2.37 <i>ns</i>         | 0.10 <i>ns</i>         | 0.14 <i>ns</i> |

Results as reported like means± standard deviation. a–b indicates significant differences ( $p < 0.05$ ) between the same sample during the shelf-life, A–C indicate significant differences ( $p < 0.05$ ) between treatments, X–Y indicate significant differences (Tukey's test;  $p \leq 0.05$ ) between raw and grilled samples. \* $p < 0.05$ , \*\* $p < 0.01$ , \*\*\* $p < 0.001$ . Form, formulation; Gr, grilling; St, storage.
